# Supplementary material
Source: PubMed Central journal article supplement (PMC7288605)

**Supplementary Figure 1: (A)** Representative photomicrographs (100 X magnifications) of H&E staining, p65 and cMYC levels in non-targeted heart in mice exposed to 2Gy, 10Gy or 2Gyx5D. **(B)** Representative photomicrographs of total cell population (DAPI) and DNA fragmentation in non-targeted heart in mice exposed to 2Gy, 10Gy or 2Gyx5D. Each tissue section was analyzed for fluorescence intensity in at least 10 areas.

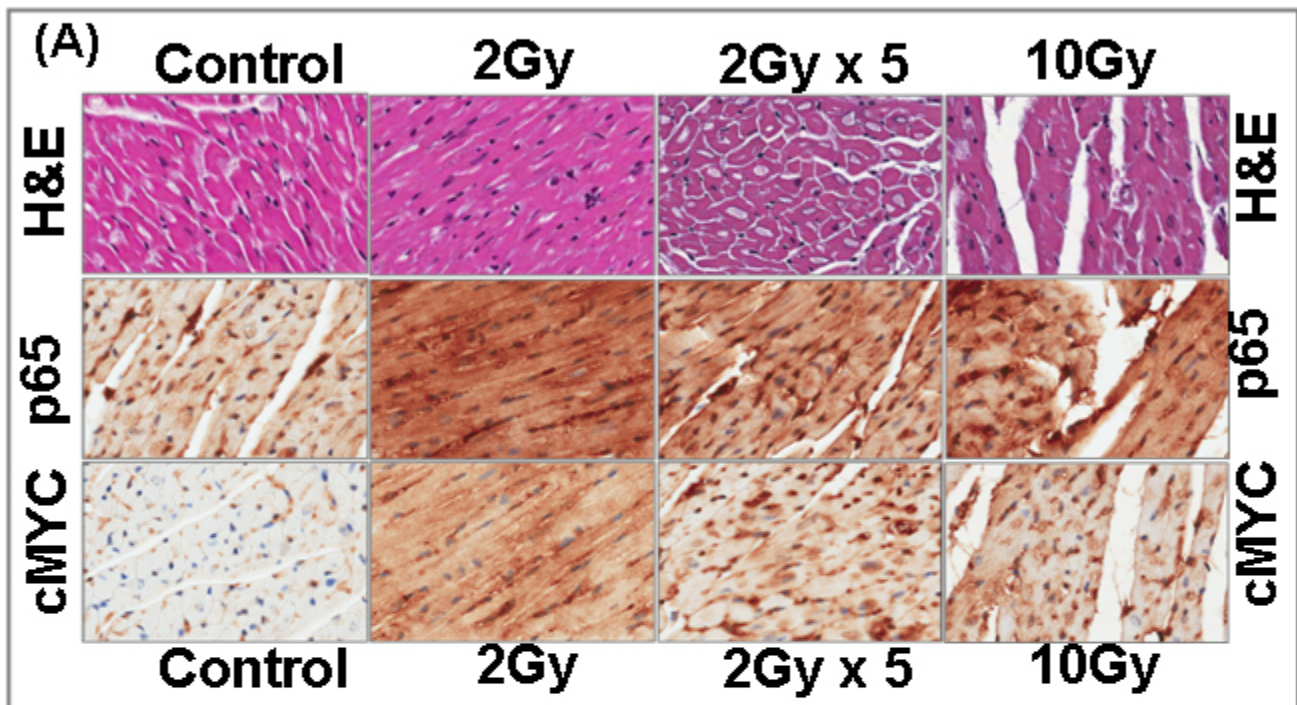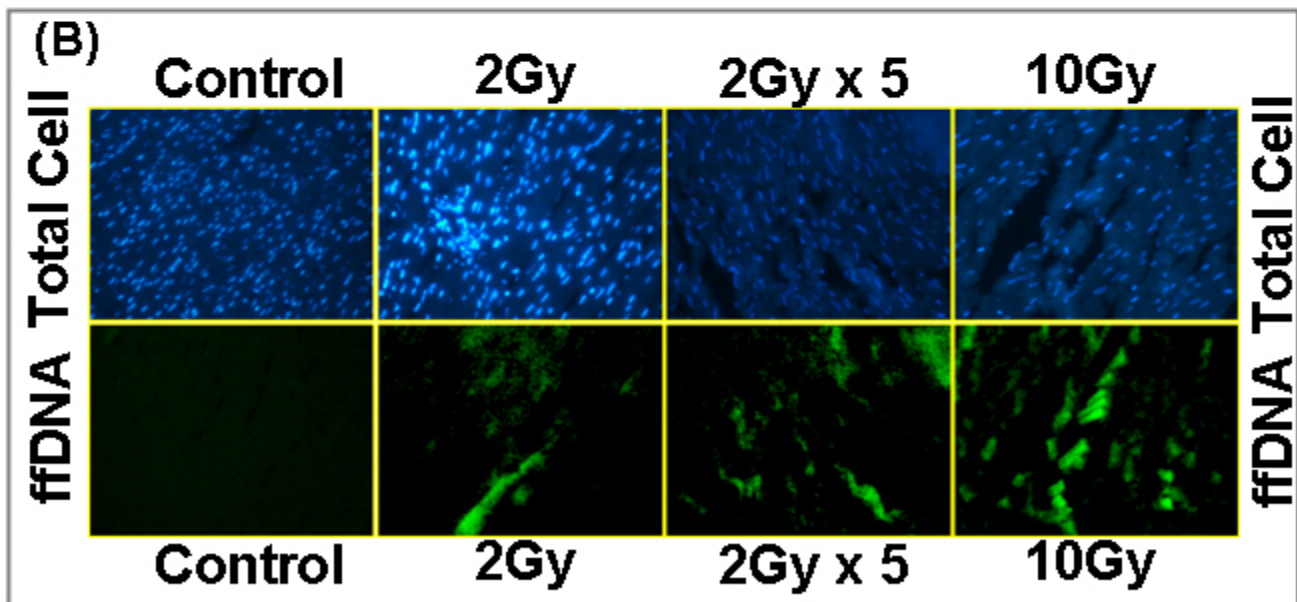

Supplement: NIHMS990941-supplement-Supplementary_Material.pdf [file NIHMS990941-supplement-Supplementary_Material.pdf]
